# Supplementary material for: Highly enhanced sensitivity of hydrogen sensors using novel palladium-decorated graphene nanoribbon film/SiO2/Si structures
Source: Royal Society of Chemistry journal article supplement (doi:10.1039/c4ta02581d), 2014-08-01
Supplement: c4ta02581d1.pdf [file c4ta02581d1.pdf]

## Supplementary Information

Highly enhanced sensitivity of hydrogen sensors using novel  
palladium-decorated graphene nanoribbon film/SiO<sub>2</sub>/Si structures

*Zhongyang Zhang<sup>ab</sup>, Qingzhong Xue<sup>\*ab</sup>, Yonggang Du<sup>\*b</sup>, Cuicui Ling<sup>b</sup>, Wei Xing<sup>b</sup>*

<sup>a</sup>State Key Laboratory of Heavy Oil Processing, China University of Petroleum,  
Qingdao 266580, Shandong, P. R. China

<sup>b</sup>College of Science, China University of Petroleum, Qingdao 266580, Shandong, P. R.  
China

E-mail: xueqingzhong@tsinghua.org.cn; duyg@upc.edu.cn

Tel: 86-532-86981169; Fax: 86-532-86981169

### 1. Selectivity of Pd-GNR/SiO<sub>2</sub>/p-Si structure towards H<sub>2</sub> over various gases.

**Fig. S1** demonstrates the good selectivity of the Pd-GNR/SiO<sub>2</sub>/p-Si structure towards H<sub>2</sub> over various gasses at room temperature, including CO<sub>2</sub>, NH<sub>3</sub>, CH<sub>4</sub> and H<sub>2</sub>O. The concentration of these gases is 10000 ppm, except H<sub>2</sub>O (~97% RH). The sensitivities of the device to 10000 ppm of CO<sub>2</sub>, NH<sub>3</sub>, CH<sub>4</sub> and 97% of H<sub>2</sub>O are 24.3%, 11.6%, 2.8% and 82.1% respectively, while the H<sub>2</sub> sensitivity of it is up to ~20000% at room temperature. This high selectivity results from the selective catalysis of Pd nanoparticles to hydrogen.

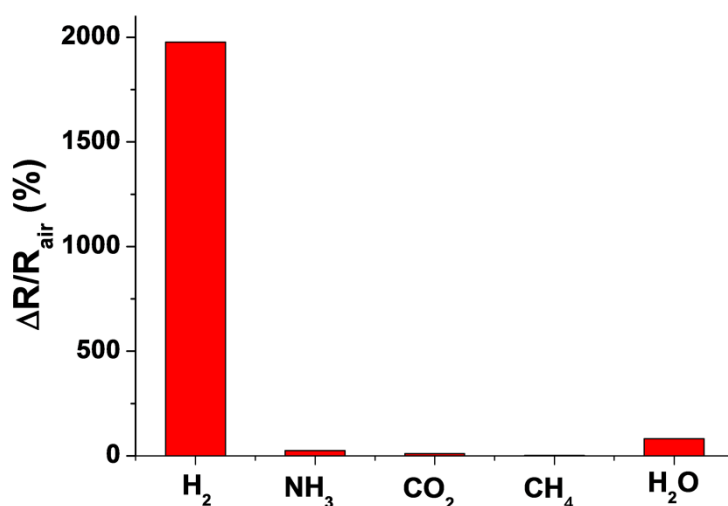

**Fig. S1.** Selectivity of Pd-GNR/SiO<sub>2</sub>/p-Si structure measured with different tested gases in air (concentration of 10000 ppm) and H<sub>2</sub>O (~97% RH) at room temperature.
